# Supplementary material for: Detection of acquired radioresistance in breast cancer cell lines using Raman spectroscopy and machine learning
Source: Royal Society of Chemistry journal article supplement (doi:10.1039/d1an00387a), 2021-01-01
Supplement: d1an00387a1.pdf [file d1an00387a1.pdf]

## Supplementary figures

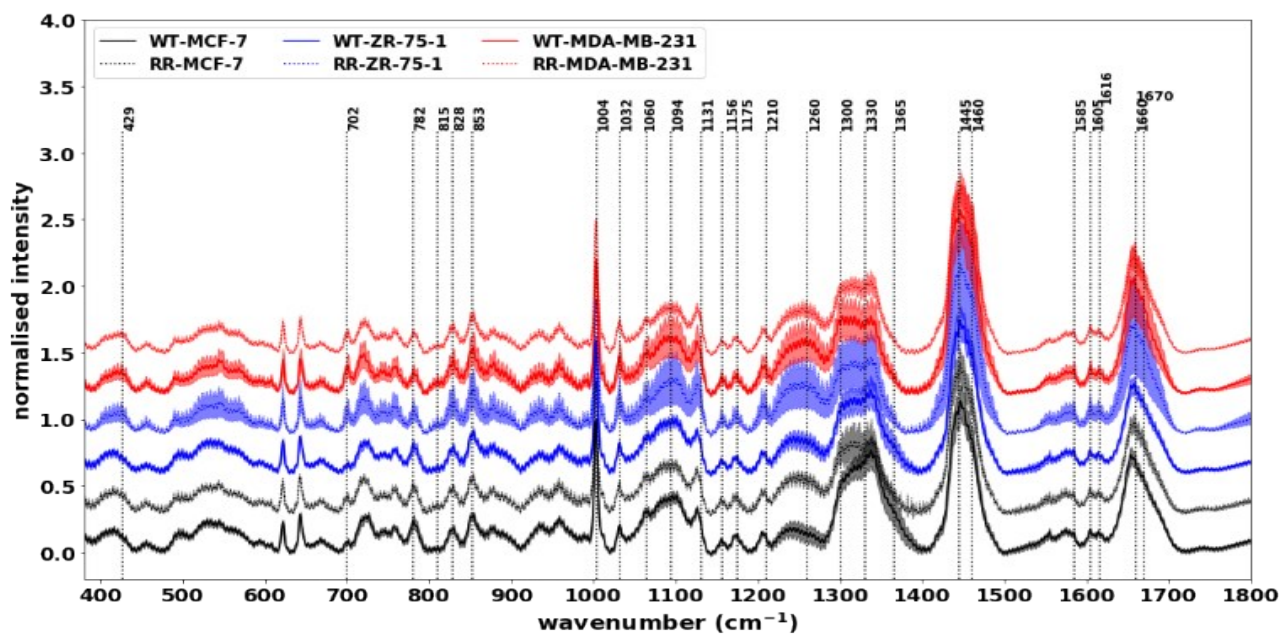

S. Fig. 1 Average Raman spectra for wild-type (WT MCF-7, WT MDA-MB-231, and WT ZR-75-1) and radioresistant (RR MCF-7, RR MDA-MB-231, and RR ZR-75-1) cell lines.

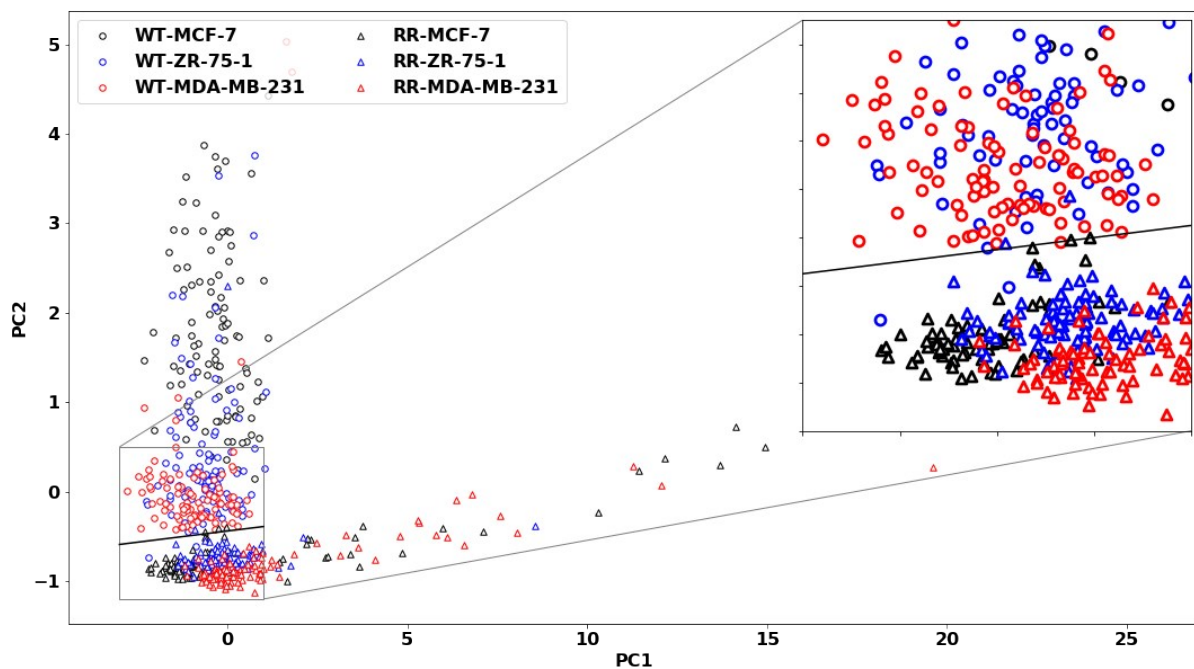

**S. Fig. 2** Principal component analysis (PCA) scatter plot for Raman spectra of wild-type (WT) and radioresistant (RR) breast cancer cells. 99.49% of the samples are classified correctly as either wild-type (circles) or radioresistant (triangles) as shown by the dividing line.
